# Supplementary material for: Active site plasticity and possible modes of chemical inhibition of the human DNA deaminase APOBEC3B
Source: PubMed Central journal article supplement (PMC6996314; doi:10.1096/fba.2019-00068), 2019-12-24
Supplement: FBA2-2-49-s001.pdf [file FBA2-2-49-s001.pdf]

UDG

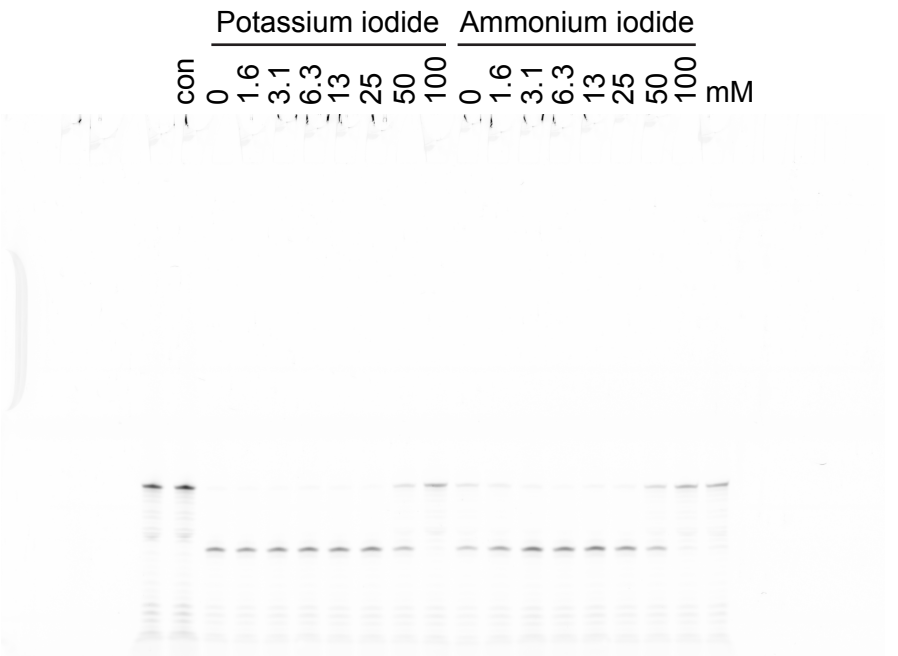

A3Bctd-QM $\Delta$ L3-GL7

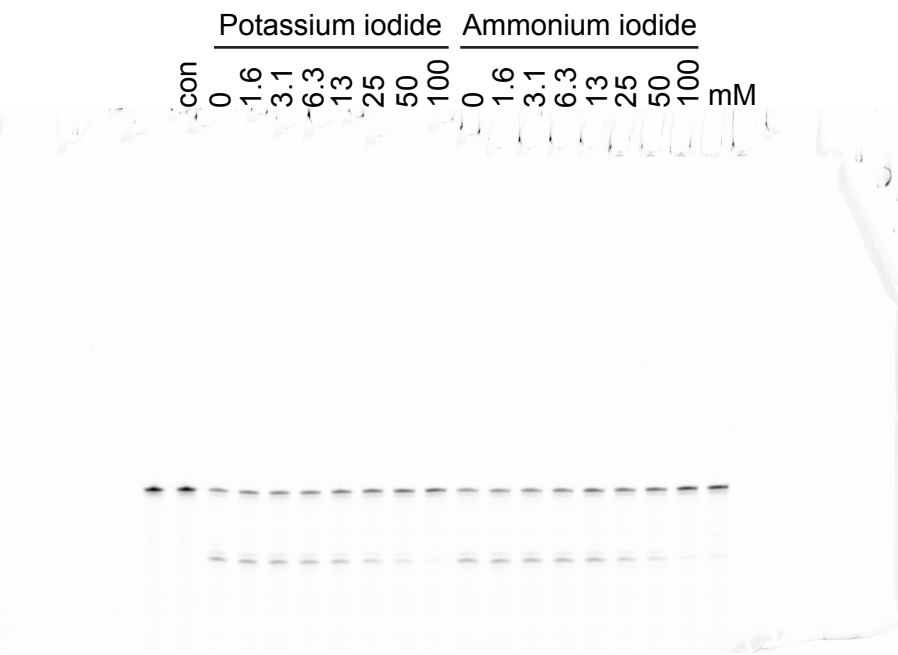

A3Bctd-QM $\Delta$ L3

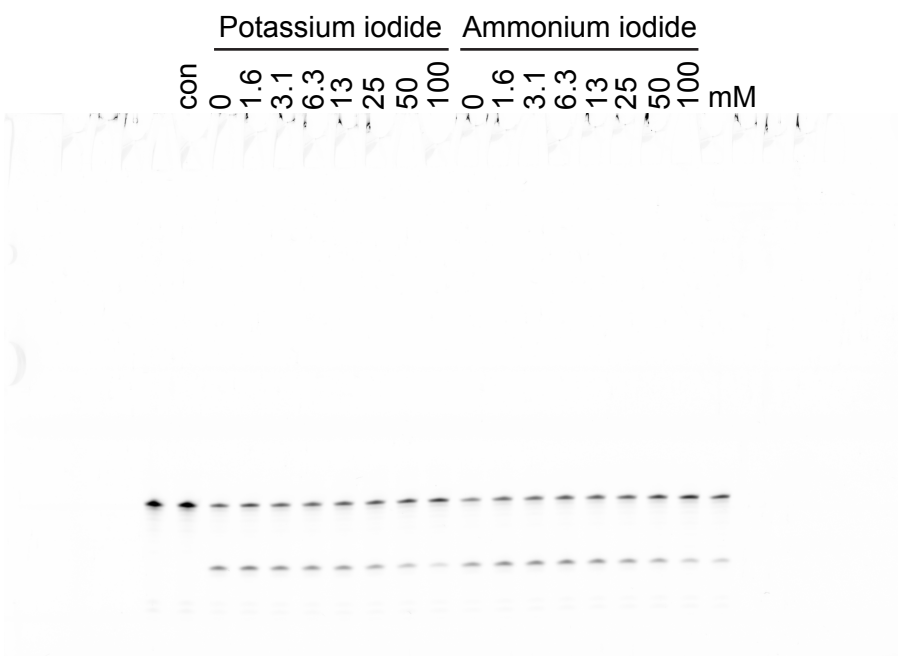

### **Supplementary Figure S1**

*In vitro* single-stranded DNA deaminase activity of A3Bctd-QM $\Delta$ L3 (top) and A3Bctd-QM $\Delta$ L3-GL7 (A3B-GL7, middle) or the uracil excision activity of UDG (bottom), tested on their optimal substrates (RSH5194, RSH6700, and RSH4782, respectively) in the presence of 0-100 mM potassium iodide or ammonium iodide. Note that a higher A3B enzyme concentration and a slightly different buffer condition than those used in the experiment shown in Supplementary Figure S2 were used here. On each gel, the outside lanes are loaded with the immediately adjacent sample to reduce edge effects when running the gels.

RSH5194: 5' -ATTATTATTATTCAAATGGATTTATTTATTTATTTATTTATTT-fluorescein

RSH6700: 5' -ATTATTATTATCCCAATGGATTTATTTATTTATTTATTTATTT-fluorescein

RSH4782: 5' -ATTATTATTATTUTAATGGATTTATTTATTTATTTATTTATTT-fluorescein
