# Supplementary material for: Active site plasticity and possible modes of chemical inhibition of the human DNA deaminase APOBEC3B
Source: PubMed Central journal article supplement (PMC6996314; doi:10.1096/fba.2019-00068), 2019-12-24
Supplement: FBA2-2-49-s002.pdf [file FBA2-2-49-s002.pdf]

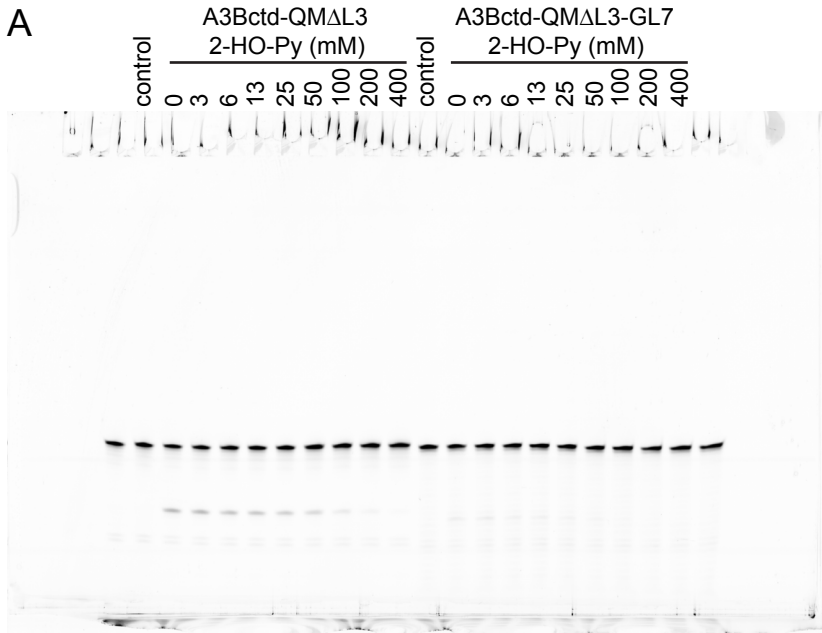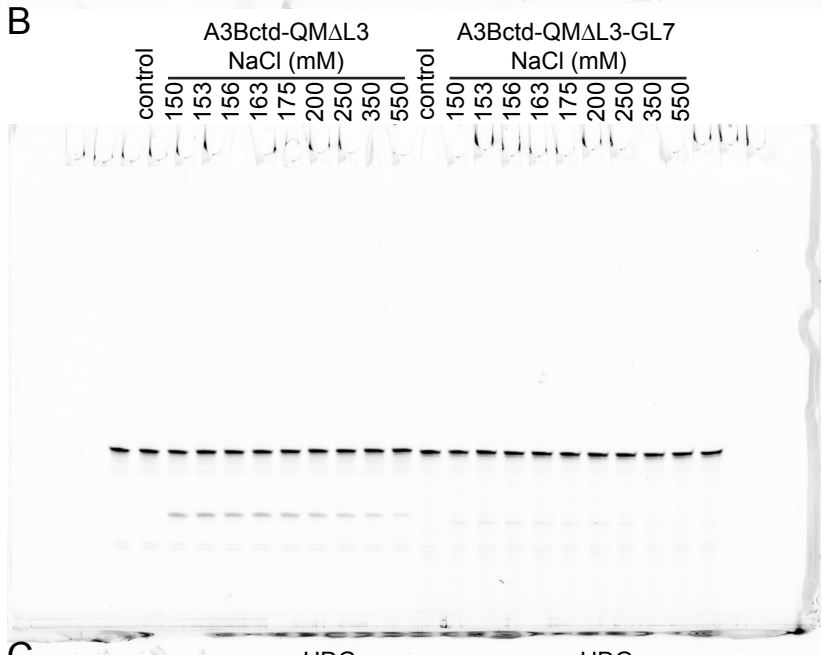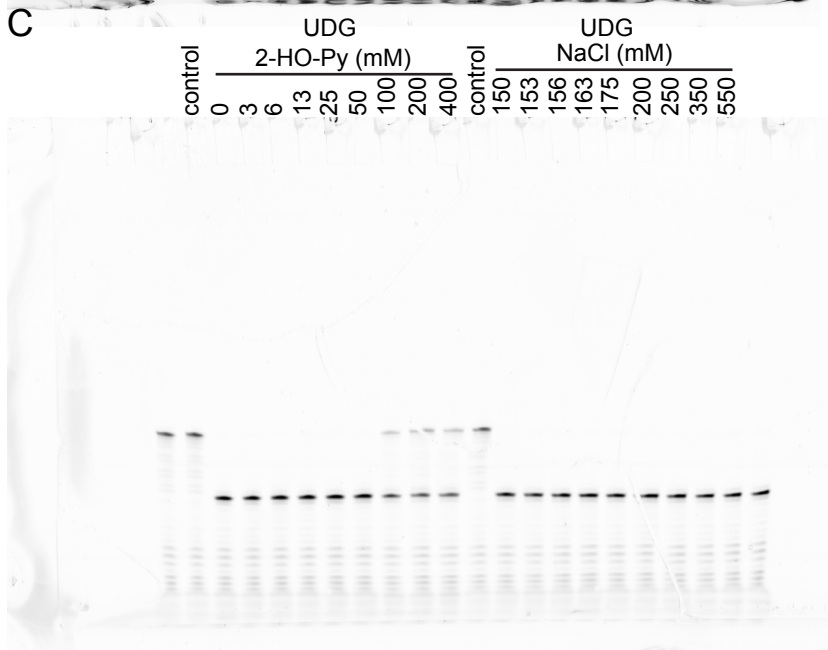

## Supplementary Figure S2

*In vitro* single-stranded DNA deaminase activity of A3Bctd-QM $\Delta$ L3 and A3Bctd-QM $\Delta$ L3-GL7 (A3B-GL7), tested on their optimal substrates (RSH5194 and RSH6700, respectively) in the presence of **A**) 2-hydroxypyrimidine from 0 to 400 mM or **B**) 0-400 mM of additional sodium chloride (150-550 mM total). **C**) In parallel with the UDG treatment of the A3B treated samples, a uracil-containing oligo (RSH4782) was treated with UDG in the presence of either 2-hydroxypyrimidine or sodium chloride to control for the possibility that 2-hydroxypyrimidine or high salt concentrations inhibit UDG. The results show that under the conditions used, high salt did not inhibit UDG but high concentrations of 2-hydroxypyrimidine did inhibit UDG. On each gel, the outside lanes are loaded with the immediately adjacent sample to reduce edge effects when running the gels.

RSH5194: 5' -ATTATTATTATTCAAATGGATTTATTTATTTATTTATTTATTT-fluorescein

RSH6700: 5' -ATTATTATTATCCCAATGGATTTATTTATTTATTTATTTATTT-fluorescein

RSH4782: 5' -ATTATTATTATTUTAATGGATTTATTTATTTATTTATTTATTT-fluorescein
