# Supplementary material for: Active site plasticity and possible modes of chemical inhibition of the human DNA deaminase APOBEC3B
Source: PubMed Central journal article supplement (PMC6996314; doi:10.1096/fba.2019-00068), 2019-12-24
Supplement: FBA2-2-49-s003.pdf [file FBA2-2-49-s003.pdf]

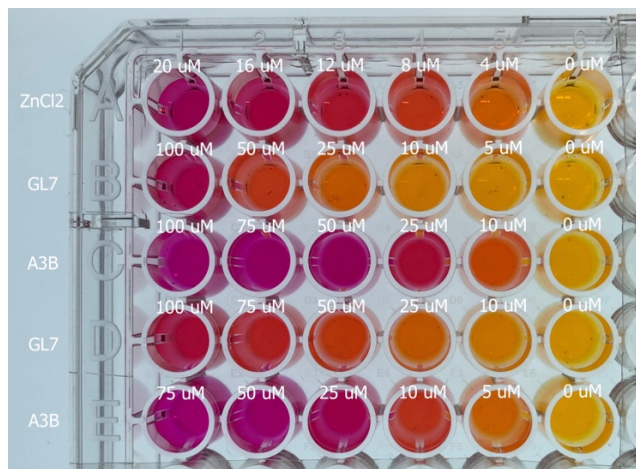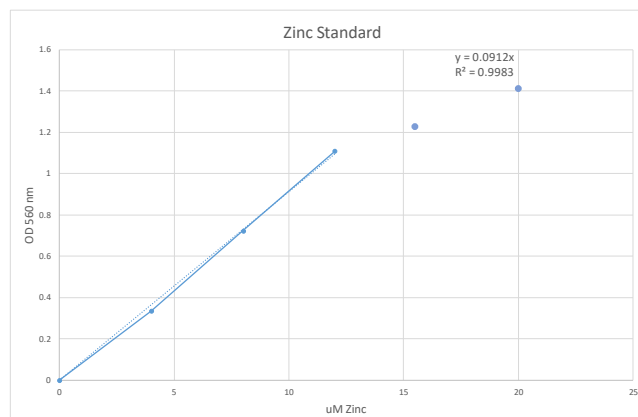

| <> | 1      | 2      | 3      | 4      | 5      | 6       | 7             |
|----|--------|--------|--------|--------|--------|---------|---------------|
| A  | 1.4043 | 1.2395 | 1.1087 | 0.7235 | 0.3348 | 0       | Zinc Standard |
| B  | 1.19   | 0.7044 | 0.346  | 0.1378 | 0.0873 | -0.0029 | GL7           |
| C  | 1.6504 | 1.6555 | 1.6042 | 1.2085 | 0.5372 | 0.0051  | A3B           |
| D  | 1.2598 | 1.0028 | 0.7117 | 0.3548 | 0.1398 | 0.0025  | GL7           |
| E  | 1.6796 | 1.6185 | 1.3703 | 0.7846 | 0.3205 | 0.0035  | A3B           |

### Supplementary Figure S3

Zinc content analysis of A3Bctd-QM $\Delta$ L3 (A3B) and A3Bctd-QM $\Delta$ L3-GL7 (GL7). The proteins were first denatured by the addition of trichloroacetic acid, and supernatant after centrifugation was subjected to the colorimetric assay in a 96-well plate (upper left). For ZnCl<sub>2</sub> standard in the first row, final zinc concentrations of 0-12  $\mu$ M after dilution with the coloring reagent showed a linear relationship with OD<sub>560</sub> (upper right). The final protein concentration indicated above each well is that of the original undenatured protein (which would have been present in the final reaction mixture if it had not been pelleted) after dilution with the coloring reagent. Different batches of A3B were used for rows C and E, whereas GL7 in rows B and D were from the same prep. OD<sub>560</sub> readings after background subtraction are shown in the table. Readings outside the linear range (numbers in gray) were not used in the concentration calculation. The zinc content of A3B and GL7 were estimated to be  $71.7 \pm 13.6$  % and  $15.8 \pm 1.40$  %, based on 3 and 8 data points within the linear range, respectively.
